# Supplementary material for: Identification of factors associated with duplicate rate in ChIP-seq data
Source: PubMed Central journal article supplement (PMC6447195; doi:10.1371/journal.pone.0214723), 2019-04-03
Supplement: pone.0214723.s001.pdf [file pone.0214723.s001.pdf]

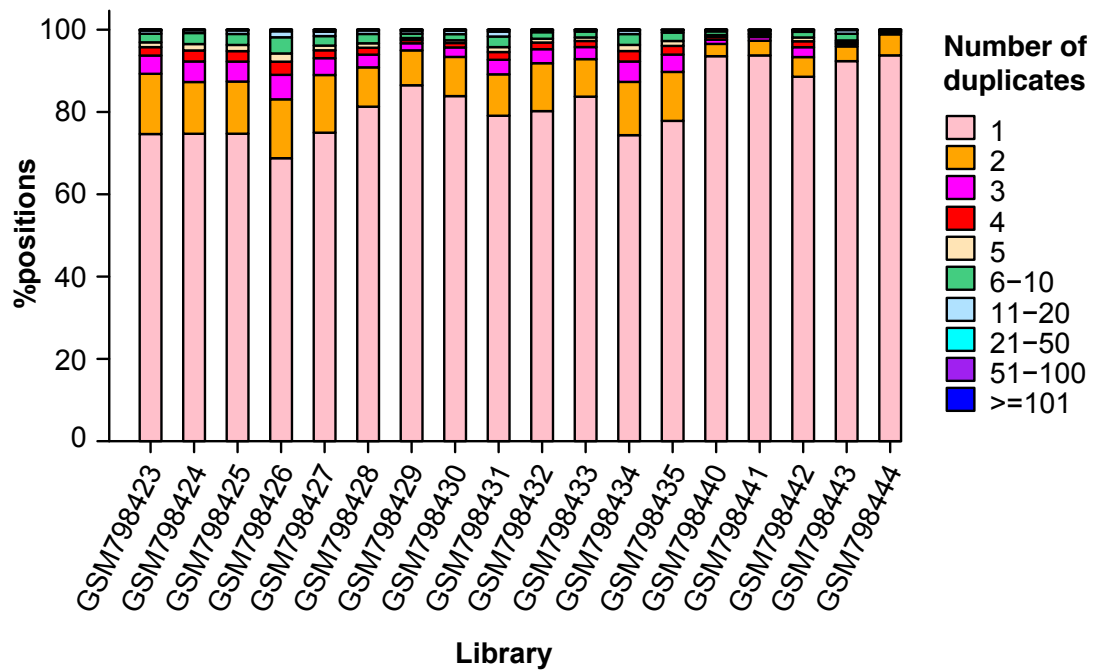

**S1 Fig. Proportion of positions with different number of duplicates in ER ChIP and input libraries.** GSM798423 to GSM798435 are IP and the other five are inputs. Only positions with at least one duplicate were included in the analysis. Ninety-four point six percent (median) of the positions had no more than three duplicates.
