# Supplementary material for: Identification of factors associated with duplicate rate in ChIP-seq data
Source: PubMed Central journal article supplement (PMC6447195; doi:10.1371/journal.pone.0214723), 2019-04-03
Supplement: pone.0214723.s002.pdf [file pone.0214723.s002.pdf]

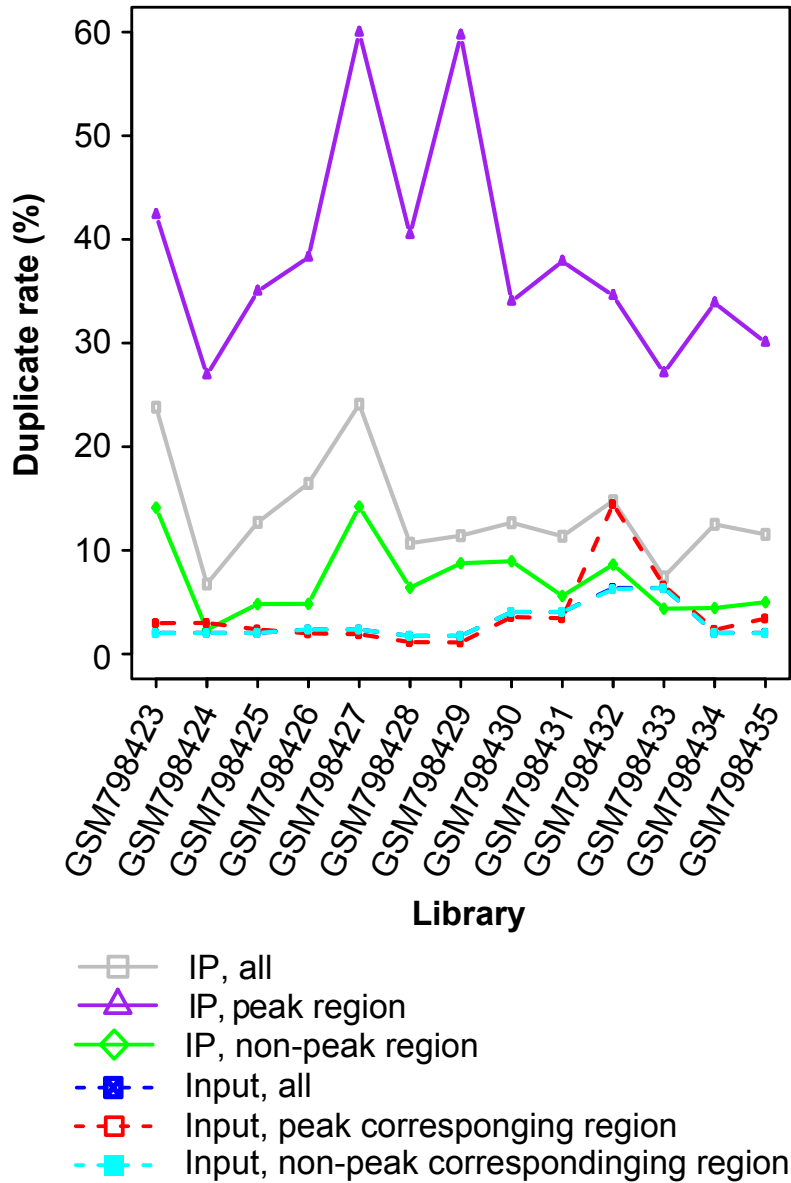

**S2 Fig. Duplicate rate in ER peaks and non-peak regions and in the corresponding regions in inputs.** Non-peak regions are 100 bp away from peaks.
