# Supplementary material for: Identification of factors associated with duplicate rate in ChIP-seq data
Source: PubMed Central journal article supplement (PMC6447195; doi:10.1371/journal.pone.0214723), 2019-04-03
Supplement: pone.0214723.s003.pdf [file pone.0214723.s003.pdf]

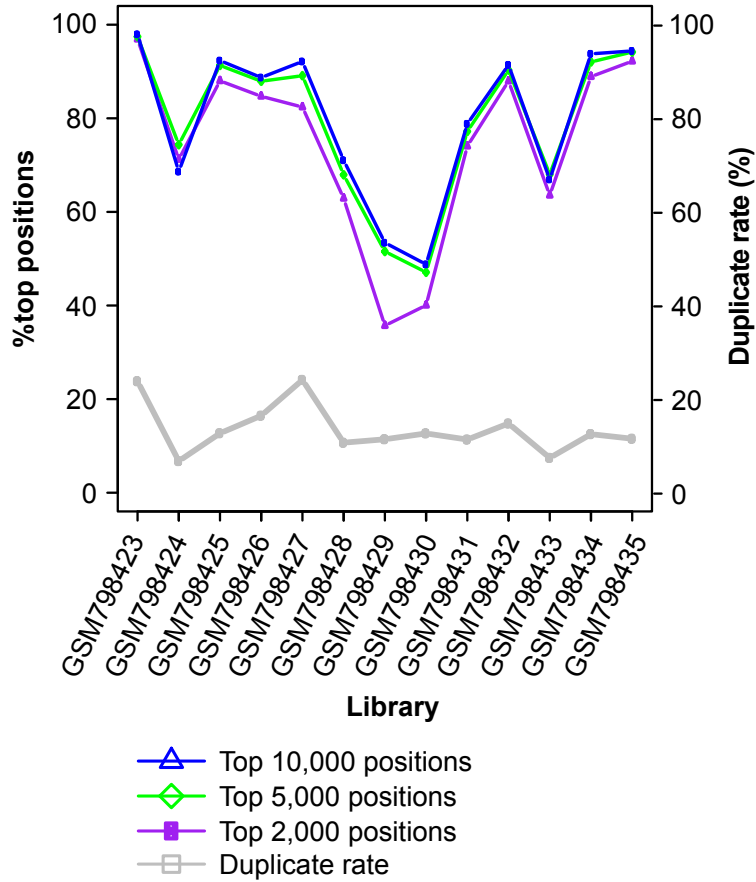

**S3 Fig. A large proportion of top positions in the ER libraries are from peaks.** For each library, the top 2,000, 5,000 and 20,000 positions with the highest number of duplicates were analyzed. The overall duplicate rate was also plotted for each library.
