# Supplementary material for: Identification of factors associated with duplicate rate in ChIP-seq data
Source: PubMed Central journal article supplement (PMC6447195; doi:10.1371/journal.pone.0214723), 2019-04-03
Supplement: pone.0214723.s004.pdf [file pone.0214723.s004.pdf]

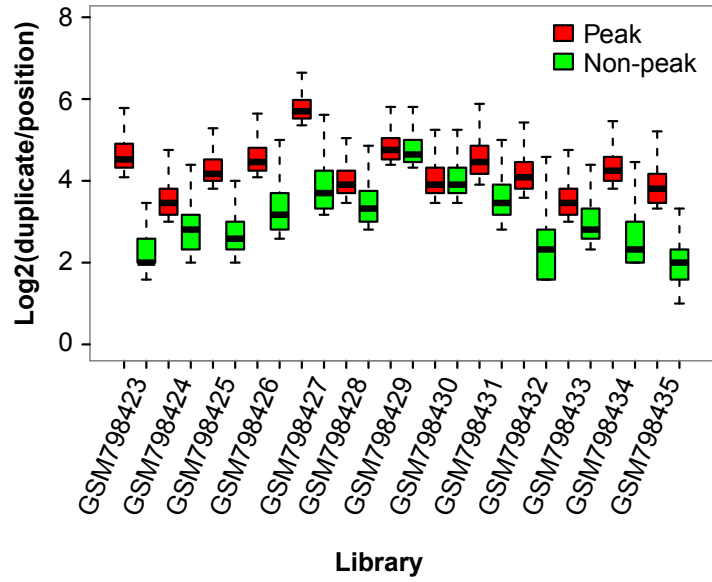

**S4 Fig. Box plot of the number of duplicates per position.** The top 10,000 positions with the most duplicates from both ER peaks and non-peak regions were analyzed. Non-peak regions are those not covered by peaks.
