# Supplementary material for: Identification of factors associated with duplicate rate in ChIP-seq data
Source: PubMed Central journal article supplement (PMC6447195; doi:10.1371/journal.pone.0214723), 2019-04-03
Supplement: pone.0214723.s005.pdf [file pone.0214723.s005.pdf]

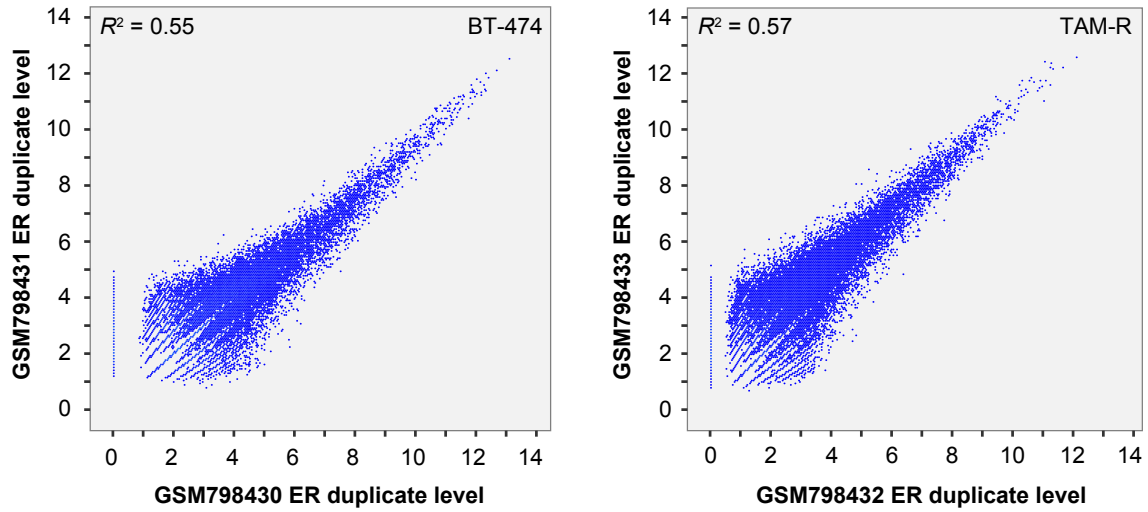

**S5 Fig. Scatter plot of duplicate level within ER peaks between replicates.**

Duplicate level was estimated as the number of reads per 10 million (RPK10M) on log<sub>2</sub> scale. Breast cancer cell lines BT-474 (left) and TAM-R (right) were shown. See Fig 2 legend for details.
