# Supplementary material for: Identification of factors associated with duplicate rate in ChIP-seq data
Source: PubMed Central journal article supplement (PMC6447195; doi:10.1371/journal.pone.0214723), 2019-04-03
Supplement: pone.0214723.s007.pdf [file pone.0214723.s007.pdf]

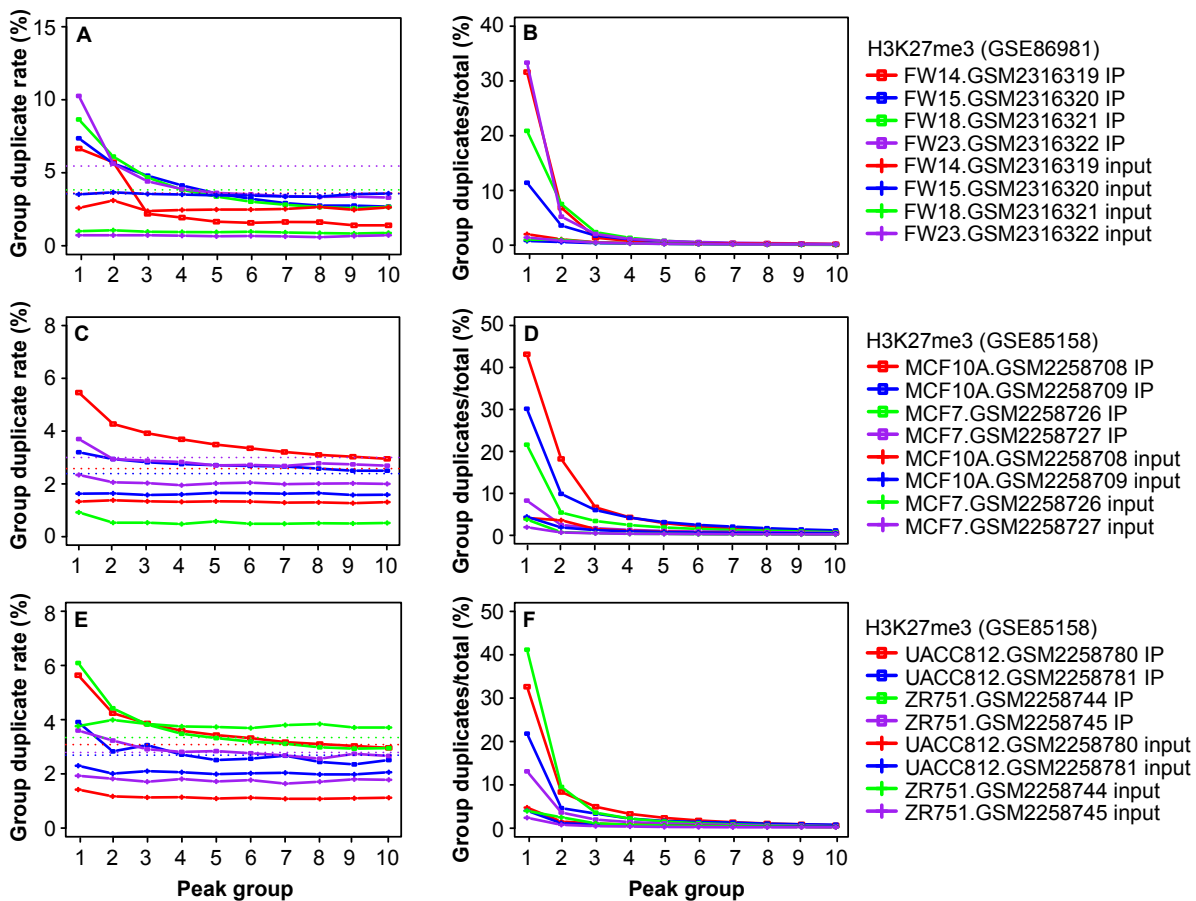

**S7 Fig. Duplicate rate versus confidence level of H3K27me3 peaks. (A,C,E)**

Duplicate rate in 10 groups of peaks and in the corresponding regions in input.

The dotted horizontal lines denote duplicate rates in the non-peak regions

(>=100 bp away from peaks). (B,D,F) Proportion of total library duplicates in

each of the groups and in the corresponding regions in input. See Figure 3

legend for details.
