# Supplementary material for: Identification of factors associated with duplicate rate in ChIP-seq data
Source: PubMed Central journal article supplement (PMC6447195; doi:10.1371/journal.pone.0214723), 2019-04-03
Supplement: pone.0214723.s009.pdf [file pone.0214723.s009.pdf]

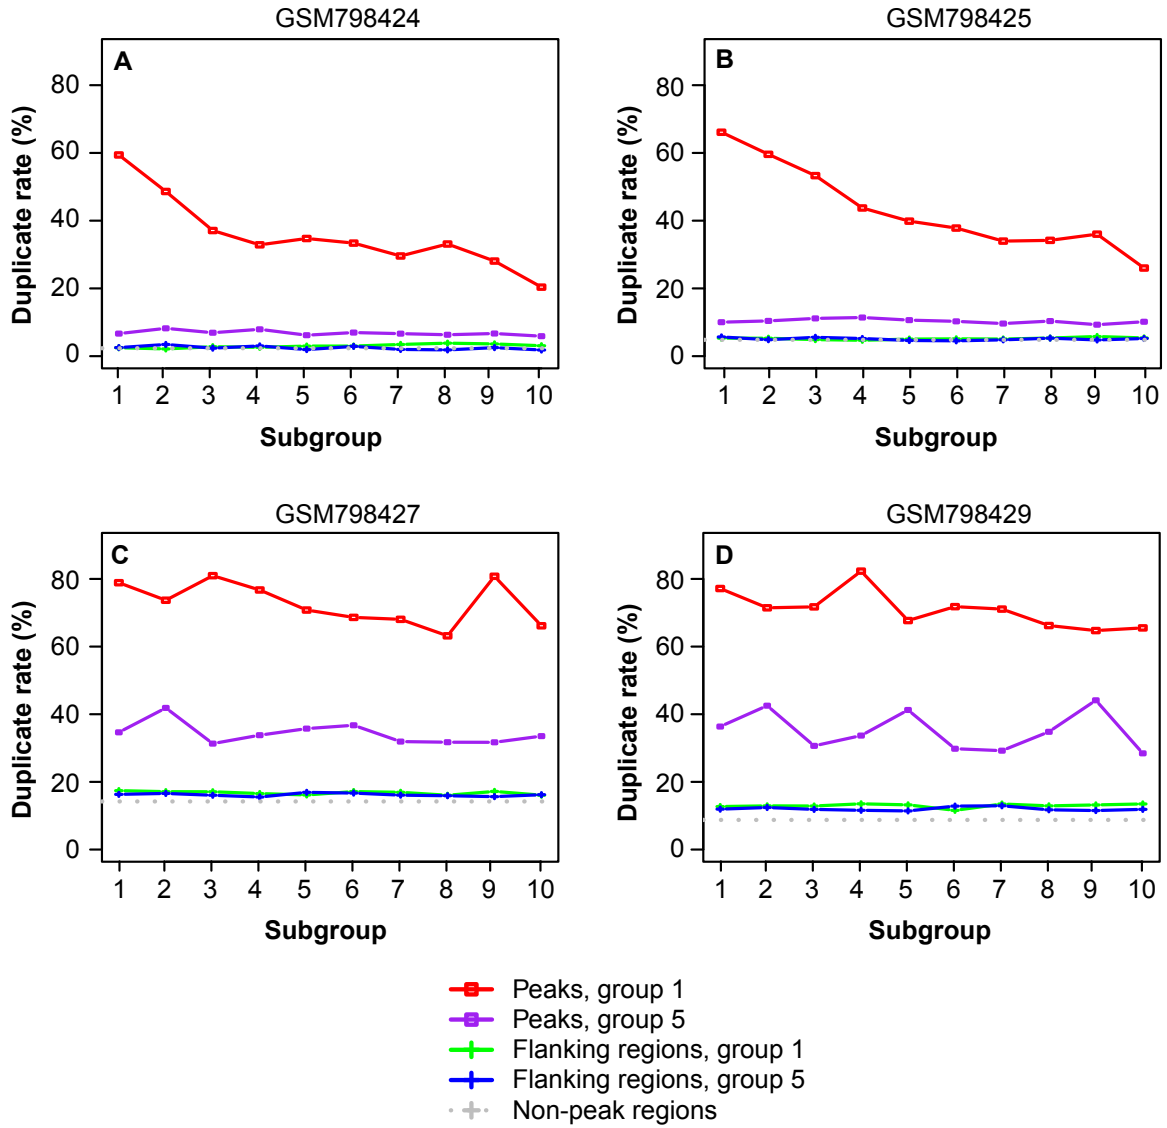

**S9 Fig. Duplicate rate in ER peaks and the flanking regions.** Peaks from group 1 (top 10% peaks with the lowest  $p$  values) and 5 (the fifth decile) were both split into 10 subgroups of equal size. Non-peak regions are 100 bp away from peaks. Flanking regions are peak 5' and 3' regions that are 300-bp away from the peaks and have the same size as the peaks. See S1 Table for sample information.
