# Supplementary material for: Identification of factors associated with duplicate rate in ChIP-seq data
Source: PubMed Central journal article supplement (PMC6447195; doi:10.1371/journal.pone.0214723), 2019-04-03
Supplement: pone.0214723.s010.pdf [file pone.0214723.s010.pdf]

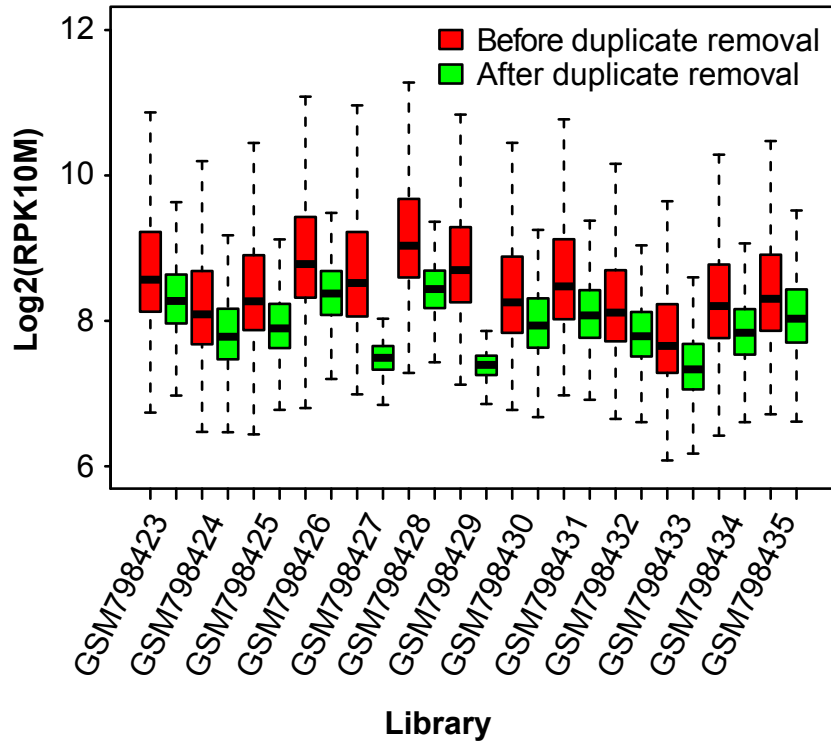

**S10 Fig. Box plot of the number of reads in ER peaks with and without duplicate removal.** Peaks were called with duplicate removal and the top 10% peaks with the smallest  $p$  values were shown. Number of raw reads in peaks was estimated from alignments both before and after duplicate removal. Y-axis indicates the input-subtracted number of reads per 10 million (RPK10M) on log2 scale. Only reads with a minimum mapping quality score of 20 and no mismatch at the first five bases were used.
