# Supplementary material for: Identification of factors associated with duplicate rate in ChIP-seq data
Source: PubMed Central journal article supplement (PMC6447195; doi:10.1371/journal.pone.0214723), 2019-04-03
Supplement: pone.0214723.s011.pdf [file pone.0214723.s011.pdf]

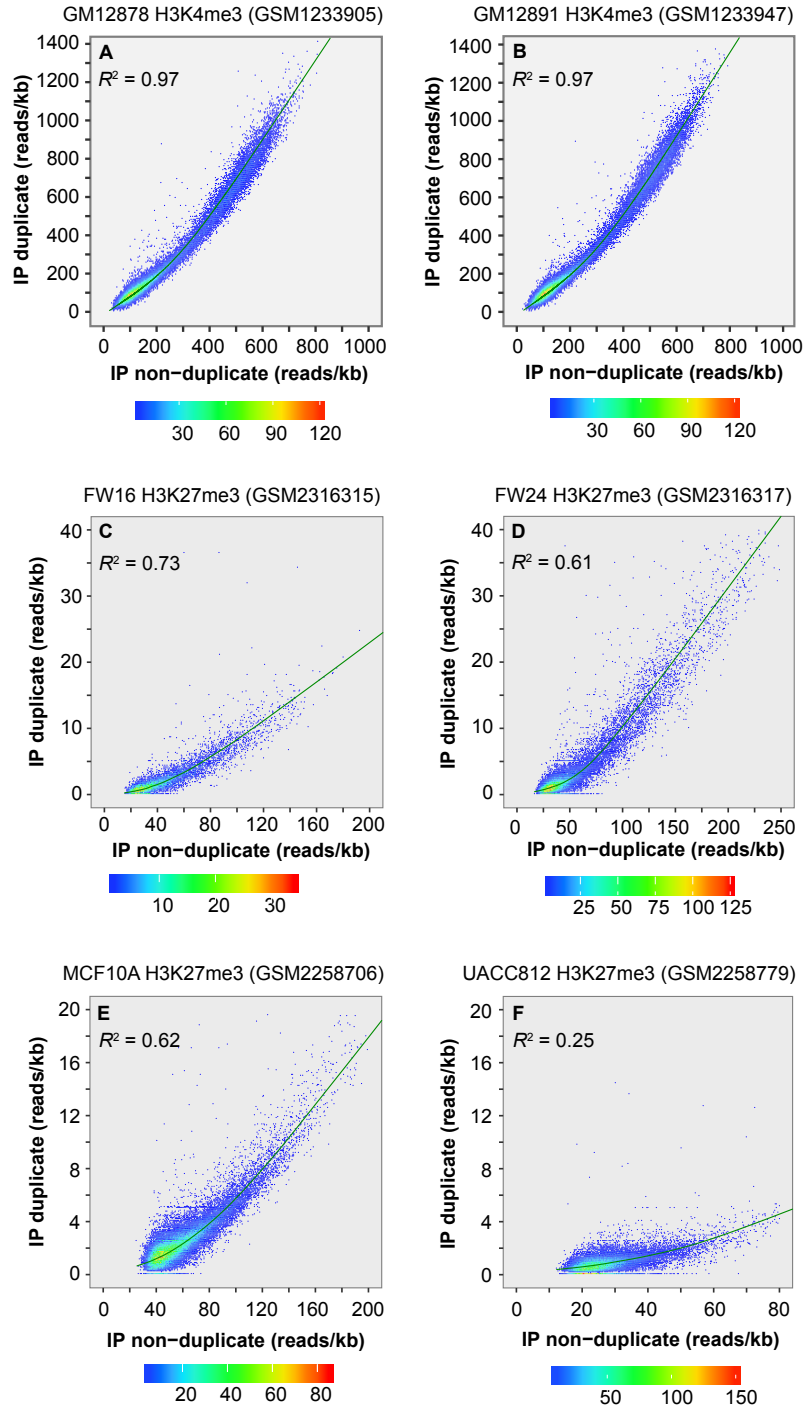

**S11 Fig. Scatter plot of duplicate versus non-duplicate level within H3K4me3 and H3K27me3 peaks. (A-B) lymphoblastoid cell lines. (C-D) fetal retinal tissue. (E-F) breast cancer cell lines. The curve was generated using the "lowess()" function in R.  $R^2$  value was calculated using Spearman rank correlation. See Fig 4 legend for details.**
