# Supplementary material for: Identification of factors associated with duplicate rate in ChIP-seq data
Source: PubMed Central journal article supplement (PMC6447195; doi:10.1371/journal.pone.0214723), 2019-04-03
Supplement: pone.0214723.s012.pdf [file pone.0214723.s012.pdf]

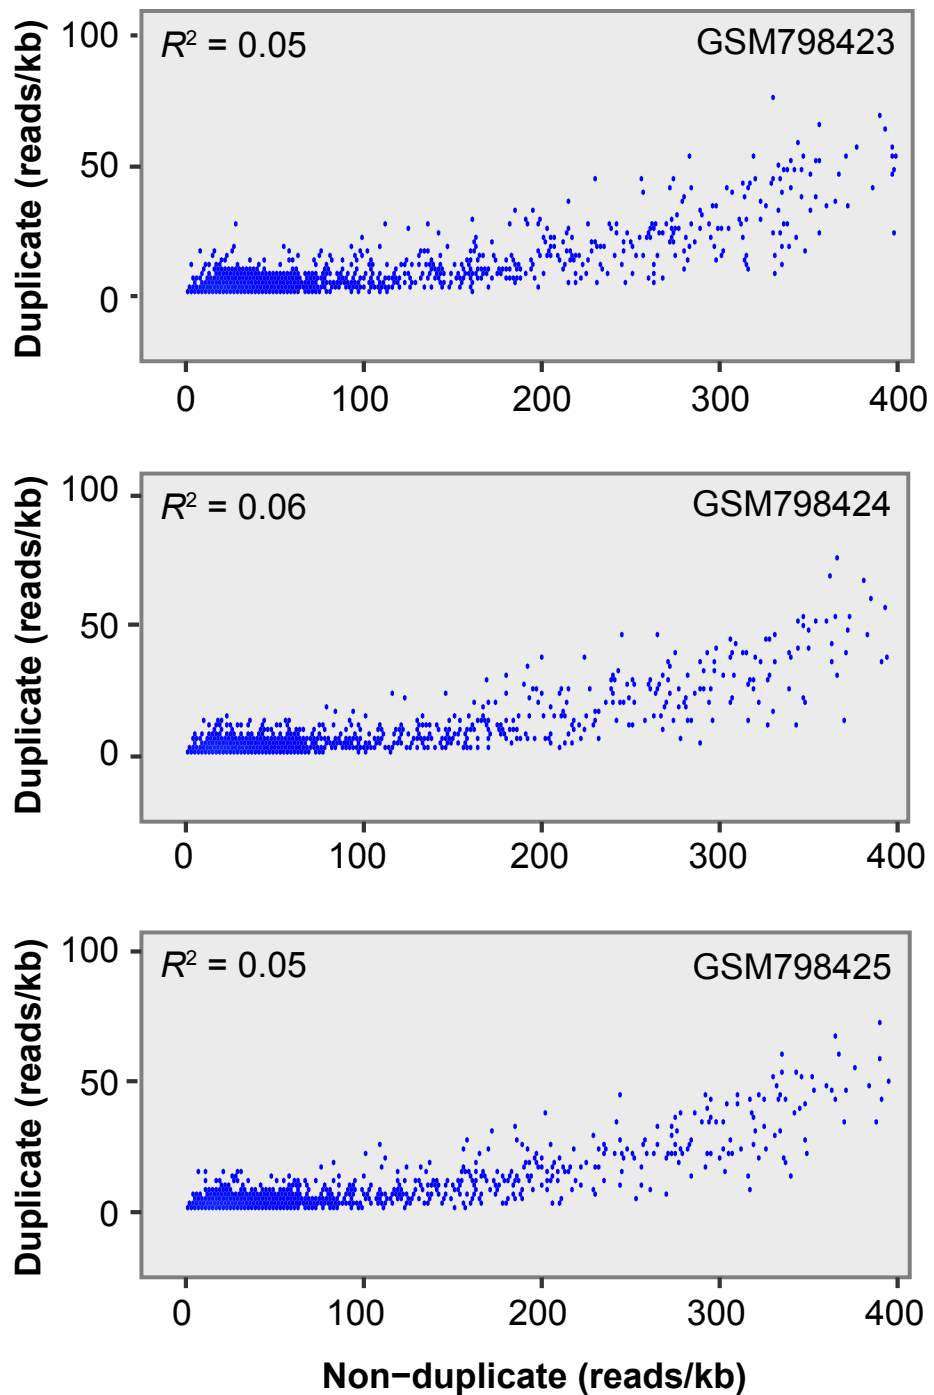

**S12 Fig. Duplicate level versus non-duplicate level in ER peak corresponding regions in input.** The coefficient of determination ( $R^2$ ) was calculated using Spearman rank correlation coefficient. See Fig 4 legend for details.
