# Supplementary material for: Identification of factors associated with duplicate rate in ChIP-seq data
Source: PubMed Central journal article supplement (PMC6447195; doi:10.1371/journal.pone.0214723), 2019-04-03
Supplement: pone.0214723.s013.pdf [file pone.0214723.s013.pdf]

**S1 Table. Public ChIP-seq data used in this study**

| Accession  | Sample  | Mark    | Rep | Len<br>(bp) | Uniquely-mapped reads |                   |           | Dup<br>rate<br>(%) | Ref |
|------------|---------|---------|-----|-------------|-----------------------|-------------------|-----------|--------------------|-----|
|            |         |         |     |             | Total                 | Non-<br>duplicate | Duplicate |                    |     |
| GSM798423  | MCF7    | ER      | 1   | 36          | 21359033              | 16272592          | 5086441   | 23.81              | (1) |
| GSM798424  | MCF7    | ER      | 2   | 36          | 21425134              | 19976300          | 1448834   | 6.76               | (1) |
| GSM798425  | MCF7    | ER      | 3   | 36          | 27545925              | 24047021          | 3498904   | 12.7               | (1) |
| GSM798426  | ZR75    | ER      | 1   | 36          | 22253226              | 18589932          | 3663294   | 16.46              | (1) |
| GSM798427  | ZR75    | ER      | 2   | 36          | 79276870              | 60170275          | 19106595  | 24.1               | (1) |
| GSM798428  | T47D    | ER      | 1   | 36          | 22081976              | 19720997          | 2360979   | 10.69              | (1) |
| GSM798429  | T47D    | ER      | 2   | 36          | 78269473              | 69328093          | 8941380   | 11.42              | (1) |
| GSM798430  | BT474   | ER      | 1   | 36          | 23114280              | 20186789          | 2927491   | 12.67              | (1) |
| GSM798431  | BT474   | ER      | 2   | 36          | 23002429              | 20388556          | 2613873   | 11.36              | (1) |
| GSM798432  | TAMR    | ER      | 1   | 36          | 24648235              | 21003432          | 3644803   | 14.79              | (1) |
| GSM798433  | TAMR    | ER      | 2   | 36          | 31151281              | 28833101          | 2318180   | 7.44               | (1) |
| GSM798434  | MCF7    | ER      | 1   | 36          | 27781866              | 24305683          | 3476183   | 12.51              | (1) |
| GSM798435  | MCF7    | ER      | 2   | 36          | 18507910              | 16371761          | 2136149   | 11.54              | (1) |
| GSM798440  | MCF7    | Input   | 1   | 36          | 21210223              | 20777470          | 432753    | 2.04               | (1) |
| GSM798441  | ZR75    | Input   | 1   | 36          | 11502752              | 11231763          | 270989    | 2.36               | (1) |
| GSM798442  | T47D    | Input   | 1   | 36          | 10705857              | 10518855          | 187002    | 1.75               | (1) |
| GSM798443  | BT474   | Input   | 1   | 36          | 16793199              | 16112871          | 680328    | 4.05               | (1) |
| GSM798444  | TAMR    | Input   | 1   | 36          | 31863425              | 29833676          | 2029749   | 6.37               | (1) |
| GSM2574780 | HepG2   | NRF1    | 1   | 50          | 16387026              | 10519371          | 5867655   | 35.81              | (2) |
| GSM2574769 | K562    | NRF1    | 1   | 50          | 20768242              | 15872708          | 4895534   | 23.57              | (2) |
| GSM2574770 | K562    | NRF1    | 2   | 50          | 20925928              | 19089859          | 1836069   | 8.77               | (2) |
| GSM2574771 | K562    | NRF1    | 3   | 50          | 19045016              | 15005621          | 4039395   | 21.21              | (2) |
| GSM2574812 | MCF7    | NRF1    | 1   | 50          | 10347139              | 8499440           | 1847699   | 17.86              | (2) |
| GSM2574813 | MCF7    | NRF1    | 2   | 50          | 10869614              | 10549815          | 319799    | 2.94               | (2) |
| GSM2574832 | HepG2   | Input   | 1   | 50          | 35233595              | 34504410          | 729185    | 2.07               | (2) |
| GSM2574827 | K562    | Input   | 1   | 50          | 41580911              | 40957796          | 623115    | 1.5                | (2) |
| GSM2574824 | MCF7    | Input   | 1   | 50          | 26377261              | 25702061          | 675200    | 2.56               | (2) |
| GSM1233880 | GM10847 | H3K4me3 | 1   | 101         | 34926147              | 27874383          | 7051764   | 20.19              | (3) |
| GSM1233881 | GM10847 | H3K4me3 | 2   | 101         | 27058899              | 19971279          | 7087620   | 26.19              | (3) |
| GSM1233905 | GM12878 | H3K4me3 | 1   | 101         | 49711836              | 22887937          | 26823899  | 53.96              | (3) |

|            |         |          |   |     |           |          |          |       |     |
|------------|---------|----------|---|-----|-----------|----------|----------|-------|-----|
| GSM1233906 | GM12878 | H3K4me3  | 2 | 101 | 37401007  | 25153801 | 12247206 | 32.75 | (3) |
| GSM1233907 | GM12878 | H3K4me3  | 3 | 101 | 38028364  | 23663127 | 14365237 | 37.78 | (3) |
| GSM1233926 | GM12890 | H3K4me3  | 1 | 101 | 29593220  | 23354062 | 6239158  | 21.08 | (3) |
| GSM1233927 | GM12890 | H3K4me3  | 2 | 101 | 35185060  | 24869723 | 10315337 | 29.32 | (3) |
| GSM1233947 | GM12891 | H3K4me3  | 1 | 101 | 50129352  | 22368471 | 27760881 | 55.38 | (3) |
| GSM1233948 | GM12891 | H3K4me3  | 2 | 101 | 33735359  | 23378283 | 10357076 | 30.7  | (3) |
| GSM1233949 | GM12891 | H3K4me3  | 3 | 101 | 31866864  | 20731979 | 11134885 | 34.94 | (3) |
| GSM1233969 | GM12892 | H3K4me3  | 1 | 101 | 47698522  | 22276584 | 25421938 | 53.3  | (3) |
| GSM1233970 | GM12892 | H3K4me3  | 2 | 101 | 30027132  | 21221926 | 8805206  | 29.32 | (3) |
| GSM1233971 | GM12892 | H3K4me3  | 3 | 101 | 37831639  | 22398153 | 15433486 | 40.8  | (3) |
| GSM1233882 | GM10847 | Input    | 1 | 101 | 35316300  | 34282105 | 1034195  | 2.93  | (3) |
| GSM1233908 | GM12878 | Input    | 1 | 101 | 47185858  | 34585263 | 12600595 | 26.7  | (3) |
| GSM1233928 | GM12890 | Input    | 1 | 101 | 31840943  | 30157510 | 1683433  | 5.29  | (3) |
| GSM1233950 | GM12891 | Input    | 1 | 101 | 51285404  | 40353756 | 10931648 | 21.32 | (3) |
| GSM1233972 | GM12892 | Input    | 1 | 101 | 55463643  | 46008701 | 9454942  | 17.05 | (3) |
| SRR2992404 | HeLa    | H3K4me3  | 1 | 51  | 140449480 | 86837367 | 53612113 | 38.17 | (4) |
| SRR2992405 | HeLa    | H3K4me3  | 2 | 51  | 143455408 | 88485544 | 54969864 | 38.32 | (4) |
| SRR2992406 | HeLa    | H3K4me3  | 3 | 51  | 160077186 | 95778707 | 64298479 | 40.17 | (4) |
| GSM2316314 | FW14    | H3K27me3 | 1 | 51  | 22930433  | 21981537 | 948896   | 4.14  | (5) |
| GSM2316315 | FW16    | H3K27me3 | 1 | 50  | 26494214  | 25473343 | 1020871  | 3.85  | (5) |
| GSM2316316 | FW18    | H3K27me3 | 1 | 51  | 34874087  | 33317054 | 1557033  | 4.46  | (5) |
| GSM2316317 | FW24    | H3K27me3 | 1 | 50  | 34045087  | 31904345 | 2140742  | 6.29  | (5) |
| GSM2316319 | FW14    | H3K36me3 | 1 | 51  | 25148476  | 24667598 | 480878   | 1.91  | (5) |
| GSM2316320 | FW15    | H3K36me3 | 1 | 50  | 22577220  | 20477412 | 2099808  | 9.3   | (5) |
| GSM2316321 | FW18    | H3K36me3 | 1 | 51  | 34869030  | 33524232 | 1344798  | 3.86  | (5) |
| GSM2316322 | FW23    | H3K36me3 | 1 | 50  | 25276028  | 24522202 | 753826   | 2.98  | (5) |
| GSM2316360 | FW14    | Input    | 1 | 50  | 29836124  | 28954648 | 881476   | 2.95  | (5) |
| GSM2316361 | FW15    | Input    | 1 | 50  | 23301393  | 22792378 | 509015   | 2.18  | (5) |
| GSM2316362 | FW16    | Input    | 1 | 50  | 27324867  | 26321251 | 1003616  | 3.67  | (5) |
| GSM2316363 | FW18    | Input    | 1 | 51  | 25179150  | 24801280 | 377870   | 1.5   | (5) |
| GSM2316365 | FW23    | Input    | 1 | 51  | 17684285  | 17436314 | 247971   | 1.4   | (5) |
| GSM2316366 | FW24    | Input    | 1 | 50  | 15760414  | 15553359 | 207055   | 1.31  | (5) |
| GSM2258688 | 76NF2V  | H3K27me3 | 1 | 36  | 50053973  | 47998676 | 2055297  | 4.11  | (6) |
| GSM2258689 | 76NF2V  | H3K27me3 | 2 | 36  | 31270025  | 30269337 | 1000688  | 3.2   | (6) |

|            |         |          |   |    |          |          |          |       |     |
|------------|---------|----------|---|----|----------|----------|----------|-------|-----|
| GSM2258760 | MB361   | H3K27me3 | 1 | 36 | 57364806 | 54944570 | 2420236  | 4.22  | (6) |
| GSM2258761 | MB361   | H3K27me3 | 2 | 36 | 32442483 | 31483899 | 958584   | 2.95  | (6) |
| GSM2258706 | MCF10A  | H3K27me3 | 1 | 36 | 51669072 | 49600697 | 2068375  | 4     | (6) |
| GSM2258707 | MCF10A  | H3K27me3 | 2 | 36 | 23093796 | 22466317 | 627479   | 2.72  | (6) |
| GSM2258724 | MCF7    | H3K27me3 | 1 | 36 | 44335211 | 28363763 | 15971448 | 36.02 | (6) |
| GSM2258725 | MCF7    | H3K27me3 | 2 | 36 | 26917903 | 26102451 | 815452   | 3.03  | (6) |
| GSM2258778 | UACC812 | H3K27me3 | 1 | 36 | 58758376 | 56526845 | 2231531  | 3.8   | (6) |
| GSM2258779 | UACC812 | H3K27me3 | 2 | 36 | 24409333 | 23704717 | 704616   | 2.89  | (6) |
| GSM2258742 | ZR751   | H3K27me3 | 1 | 36 | 43453702 | 41615247 | 1838455  | 4.23  | (6) |
| GSM2258743 | ZR751   | H3K27me3 | 2 | 36 | 23720248 | 23035418 | 684830   | 2.89  | (6) |
| GSM2258690 | 76NF2V  | H3K36me3 | 1 | 36 | 47440920 | 45878037 | 1562883  | 3.29  | (6) |
| GSM2258691 | 76NF2V  | H3K36me3 | 2 | 36 | 32033764 | 30565279 | 1468485  | 4.58  | (6) |
| GSM2258762 | MB361   | H3K36me3 | 1 | 36 | 45887840 | 44099328 | 1788512  | 3.9   | (6) |
| GSM2258763 | MB361   | H3K36me3 | 2 | 36 | 23128814 | 22394079 | 734735   | 3.18  | (6) |
| GSM2258708 | MCF10A  | H3K36me3 | 1 | 36 | 40093983 | 38787401 | 1306582  | 3.26  | (6) |
| GSM2258709 | MCF10A  | H3K36me3 | 2 | 36 | 24677639 | 23722610 | 955029   | 3.87  | (6) |
| GSM2258726 | MCF7    | H3K36me3 | 1 | 36 | 65076310 | 58566177 | 6510133  | 10    | (6) |
| GSM2258727 | MCF7    | H3K36me3 | 2 | 36 | 24321210 | 23118939 | 1202271  | 4.94  | (6) |
| GSM2258780 | UACC812 | H3K36me3 | 1 | 36 | 61536555 | 58450481 | 3086074  | 5.02  | (6) |
| GSM2258781 | UACC812 | H3K36me3 | 2 | 36 | 16769008 | 16219844 | 549164   | 3.27  | (6) |
| GSM2258744 | ZR751   | H3K36me3 | 1 | 36 | 47687434 | 45970765 | 1716669  | 3.6   | (6) |
| GSM2258745 | ZR751   | H3K36me3 | 2 | 36 | 23278359 | 22618297 | 660062   | 2.84  | (6) |
| GSM2258702 | 76NF2V  | Input    | 1 | 36 | 35766057 | 35261677 | 504380   | 1.41  | (6) |
| GSM2258703 | 76NF2V  | Input    | 2 | 36 | 20795614 | 20364387 | 431227   | 2.07  | (6) |
| GSM2258774 | MB361   | Input    | 1 | 36 | 38128273 | 37613495 | 514778   | 1.35  | (6) |
| GSM2258775 | MB361   | Input    | 2 | 36 | 21872989 | 21363210 | 509779   | 2.33  | (6) |
| GSM2258720 | MCF10A  | Input    | 1 | 36 | 61744537 | 60612759 | 1131778  | 1.83  | (6) |
| GSM2258721 | MCF10A  | Input    | 2 | 36 | 15918399 | 15597818 | 320581   | 2.01  | (6) |
| GSM2258738 | MCF7    | Input    | 1 | 36 | 23659654 | 23411185 | 248469   | 1.05  | (6) |
| GSM2258739 | MCF7    | Input    | 2 | 36 | 21885042 | 21306567 | 578475   | 2.64  | (6) |
| GSM2258792 | UACC812 | Input    | 1 | 36 | 48384203 | 47570218 | 813985   | 1.68  | (6) |
| GSM2258793 | UACC812 | Input    | 2 | 36 | 22451322 | 21911029 | 540293   | 2.41  | (6) |
| GSM2258756 | ZR751   | Input    | 1 | 36 | 44018883 | 42117200 | 1901683  | 4.32  | (6) |
| GSM2258757 | ZR751   | Input    | 2 | 36 | 19923712 | 19515963 | 407749   | 2.05  | (6) |

---

ER ChIP-seq data in five breast cancer cell lines were downloaded from NCBI under accession GSE32222. NRF1 ChIP-seq data were from GSE97661. H3K4me3 ChIP-seq data in five lymphoblastoid cell lines were from GSE50893. PCR-free H3K4me3 ChIP-seq data in HeLa were from SRP067250. H3K27me3 and H3K36me3 ChIP-seq data in fetal retinal tissue (FW14, FW15, FW16, FW18, FW23 and FW24) were from GSE86981. H3K27me3 and H3K36me3 ChIP-seq data in six breast cancer cell lines (76NF2V, MB361, MCF10A, MCF7, UACC812, and ZR751) were from GSE85158. Only uniquely mapped reads with a minimum mapping quality score of 20 and no mismatch at the first five bases were used. Dup rate, duplicate rate; Rep, replicate; Len, length.

## References

1. Ross-Innes CS, Stark R, Teschendorff AE, Holmes KA, Ali HR, Dunning MJ, et al. Differential oestrogen receptor binding is associated with clinical outcome in breast cancer. *Nature*. 2012; 481(7381):389-93.
2. Venkataraman A, Yang K, Irizarry J, Mackiewicz M, Mita P, Kuang Z, et al. A toolbox of immunoprecipitation-grade monoclonal antibodies to human transcription factors. *Nature methods*. 2018; 15(5):330-8.
3. Kasowski M, Kyriazopoulou-Panagiotopoulou S, Grubert F, Zaugg JB, Kundaje A, Liu Y, et al. Extensive variation in chromatin states across humans. *Science (New York, NY)*. 2013; 342(6159):750-2.
4. Sundaram AY, Hughes T, Biondi S, Bolduc N, Bowman SK, Camilli A, et al. A comparative study of ChIP-seq sequencing library preparation methods. *BMC genomics*. 2016; 17(1):816.
5. Aldiri I, Xu B, Wang L, Chen X, Hiler D, Griffiths L, et al. The Dynamic Epigenetic Landscape of the Retina During Development, Reprogramming, and Tumorigenesis. *Neuron*. 2017; 94(3):550-68.e10.
6. Franco HL, Nagari A, Malladi VS, Li W, Xi Y, Richardson D, et al. Enhancer transcription reveals subtype-specific gene expression programs controlling breast cancer pathogenesis. *Genome research*. 2018; 28(2):159-70.
