# Supplementary material for: Identification of factors associated with duplicate rate in ChIP-seq data
Source: PubMed Central journal article supplement (PMC6447195; doi:10.1371/journal.pone.0214723), 2019-04-03
Supplement: pone.0214723.s014.pdf [file pone.0214723.s014.pdf]

**S2 Table. Number of ER peaks with the most highly duplicated positions**

| Accession | Sample | Dup rate (%) | Number of top positions* |      |       | Peaks w/ ER motif (%)** |
|-----------|--------|--------------|--------------------------|------|-------|-------------------------|
|           |        |              | 2000                     | 5000 | 10000 |                         |
| GSM798423 | MCF7   | 23.81        | 73                       | 189  | 328   | 73.48                   |
| GSM798424 | MCF7   | 6.76         | 91                       | 223  | 408   | 72.55                   |
| GSM798425 | MCF7   | 12.70        | 68                       | 164  | 295   | 77.63                   |
| GSM798426 | ZR75   | 16.46        | 98                       | 188  | 326   | 87.12                   |
| GSM798427 | ZR75   | 24.10        | 86                       | 146  | 236   | 79.24                   |
| GSM798428 | T47D   | 10.69        | 80                       | 161  | 263   | 77.95                   |
| GSM798429 | T47D   | 11.42        | 67                       | 120  | 196   | 83.16                   |
| GSM798430 | BT474  | 12.67        | 68                       | 132  | 240   | 86.67                   |
| GSM798431 | BT474  | 11.36        | 53                       | 116  | 198   | 86.36                   |
| GSM798432 | TAMR   | 14.79        | 62                       | 177  | 363   | 78.79                   |
| GSM798433 | TAMR   | 7.44         | 57                       | 182  | 396   | 78.28                   |
| GSM798434 | MCF7   | 12.51        | 63                       | 144  | 284   | 73.94                   |
| GSM798435 | MCF7   | 11.54        | 79                       | 196  | 372   | 71.77                   |

ER peaks were identified using MACS after duplicate removal.

\* The top 2,000, 5,000, and 10,000 positions were those that had the highest number of duplicates in peaks.

\*\* ER motif was identified from peaks with the top 10,000 positions.
