# Supplementary material for: Identification of factors associated with duplicate rate in ChIP-seq data
Source: PubMed Central journal article supplement (PMC6447195; doi:10.1371/journal.pone.0214723), 2019-04-03
Supplement: pone.0214723.s015.pdf [file pone.0214723.s015.pdf]

**S3 Table. Number of ER peaks called with and without duplicate removal**

| Accession | Dup rate (%) | Dup in peak (%) | Peaks w/ duplicate removal |        |                 | Peaks w/o duplicate removal |        |                 | Caller    |
|-----------|--------------|-----------------|----------------------------|--------|-----------------|-----------------------------|--------|-----------------|-----------|
|           |              |                 | Shared                     | Unique | Unique w/ motif | Shared                      | Unique | Unique w/ motif |           |
| GSM798423 | 23.81        | 60.98           | 60789                      | 7152   | 2215 (30.97)    | 61011                       | 1595   | 732 (45.89)     | macs2     |
| GSM798424 | 6.76         | 71.25           | 39977                      | 5166   | 1411 (27.31)    | 40092                       | 181    | 29 (16.02)      | macs2     |
| GSM798425 | 12.7         | 71.79           | 52740                      | 3378   | 1216 (36)       | 52810                       | 756    | 218 (28.84)     | macs2     |
| GSM798426 | 16.46        | 80.68           | 49341                      | 4615   | 435 (9.43)      | 49515                       | 316    | 27 (8.54)       | macs2     |
| GSM798427 | 24.1         | 53.26           | 31632                      | 2604   | 375 (14.4)      | 31578                       | 775    | 155 (20)        | macs2     |
| GSM798428 | 10.69        | 47.63           | 15315                      | 542    | 53 (9.78)       | 15281                       | 551    | 88 (15.97)      | macs2     |
| GSM798429 | 11.42        | 26.89           | 6563                       | 37     | 0 (0)           | 6491                        | 892    | 319 (35.76)     | macs2     |
| GSM798430 | 12.67        | 39.7            | 30361                      | 1291   | 183 (14.18)     | 30321                       | 1369   | 111 (8.11)      | macs2     |
| GSM798431 | 11.36        | 59.37           | 30354                      | 1594   | 153 (9.6)       | 30336                       | 848    | 88 (10.38)      | macs2     |
| GSM798432 | 14.79        | 55.12           | 55963                      | 923    | 114 (12.35)     | 55808                       | 4714   | 950 (20.15)     | macs2     |
| GSM798433 | 7.44         | 48.98           | 43255                      | 888    | 162 (18.24)     | 43147                       | 2502   | 611 (24.42)     | macs2     |
| GSM798434 | 12.51        | 73.99           | 56217                      | 3573   | 964 (26.98)     | 56269                       | 796    | 344 (43.22)     | macs2     |
| GSM798435 | 11.54        | 67.71           | 54883                      | 2224   | 374 (16.82)     | 54858                       | 2399   | 654 (27.26)     | macs2     |
| GSM798423 | 23.81        | 44.76           | 67579                      | 5676   | 2011 (35.43)    | 67579                       | 3889   | 1449 (37.26)    | findPeaks |
| GSM798424 | 6.76         | 28.06           | 48317                      | 3565   | 1464 (41.07)    | 48317                       | 620    | 195 (31.45)     | findPeaks |
| GSM798425 | 12.7         | 36.32           | 63540                      | 4123   | 1458 (35.36)    | 63540                       | 1430   | 390 (27.27)     | findPeaks |
| GSM798426 | 16.46        | 39.8            | 62723                      | 5840   | 1907 (32.65)    | 62723                       | 834    | 194 (23.26)     | findPeaks |
| GSM798427 | 24.1         | 58.62           | 44420                      | 3801   | 1389 (36.54)    | 44420                       | 1017   | 242 (23.80)     | findPeaks |
| GSM798428 | 10.69        | 41.13           | 22688                      | 1149   | 419 (36.47)     | 22688                       | 1215   | 251 (20.66)     | findPeaks |
| GSM798429 | 11.42        | 56.56           | 10921                      | 508    | 194 (38.19)     | 10921                       | 769    | 184 (23.93)     | findPeaks |
| GSM798430 | 12.67        | 34.79           | 39786                      | 2035   | 619 (30.42)     | 39786                       | 2369   | 749 (31.62)     | findPeaks |
| GSM798431 | 11.36        | 39.07           | 39099                      | 2398   | 769 (32.07)     | 39099                       | 1311   | 396 (30.21)     | findPeaks |
| GSM798432 | 14.79        | 36.87           | 56755                      | 2326   | 643 (27.64)     | 56755                       | 3028   | 733 (24.21)     | findPeaks |
| GSM798433 | 7.44         | 29.01           | 45117                      | 2057   | 553 (26.88)     | 45117                       | 1305   | 276 (21.15)     | findPeaks |
| GSM798434 | 12.51        | 34.88           | 67433                      | 4529   | 1147 (25.33)    | 67433                       | 1497   | 294 (19.64)     | findPeaks |
| GSM798435 | 11.54        | 31.9            | 57429                      | 3053   | 991 (32.46)     | 57429                       | 1871   | 509 (27.20)     | findPeaks |

Number in the parenthesis refers to the percentage of unique peaks with ER motif. For unique peaks identified by findPeaks in ZR75 (GSM798426-GSM798427), T47D (GSM798428-GSM798429) and BT474 (GSM798430-GSM798431), match to AP-2 motif was also counted as AP-2 motif was commonly adjacent to ER motif (PMID: 21179027). %Dup in peak, the number of duplicates in peaks over the total duplicates in the library; Dup, duplicate.
