# Supplementary material for: Identification of factors associated with duplicate rate in ChIP-seq data
Source: PubMed Central journal article supplement (PMC6447195; doi:10.1371/journal.pone.0214723), 2019-04-03
Supplement: pone.0214723.s016.pdf [file pone.0214723.s016.pdf]

**S4 Table. Number of NRF1 peaks called with and without duplicate removal**

| Accession  | Sample | Rep | Dup   | Dup<br>in<br>rate<br>(%) | Dup<br>peak<br>(%) | With Duplicate removal |        | No duplicate removal |                     |
|------------|--------|-----|-------|--------------------------|--------------------|------------------------|--------|----------------------|---------------------|
|            |        |     |       |                          |                    | Shared                 | Unique | Shared               | Unique              |
| GSM2574780 | HepG2  | 1   | 35.81 | 48.34                    | 7680               | 147                    | 7676   | 1528                 | (23.89;22.25;25.72) |
| GSM2574769 | K562   | 1   | 23.57 | 81.38                    | 15078              | 1272                   | 15153  | 115                  | (12.89;57.55;71.23) |
| GSM2574770 | K562   | 2   | 8.77  | 30.06                    | 7144               | 80                     | 7138   | 355                  | (na;68.75;80)       |
| GSM2574771 | K562   | 3   | 21.21 | 79.49                    | 13177              | 999                    | 13234  | 185                  | (51.55;60.85;71.27) |
| GSM2574812 | MCF7   | 1   | 17.86 | 91.61                    | 8321               | 589                    | 8338   | 32                   | (36.84;62.26;76.68) |
| GSM2574813 | MCF7   | 2   | 2.94  | 29.08                    | 3907               | 18                     | 3906   | 127                  | (20.03;64.69;60.1)  |
|            |        |     |       |                          |                    |                        |        |                      | (na;72.22;72.22)    |
|            |        |     |       |                          |                    |                        |        |                      | (58.27;77.95;77.95) |

Number in the parenthesis refers to the percentage of unique peaks with the NRF1 DNA binding motif, overlapping the 4-kb windows centered on the transcriptional start sites and the H3K4me3 peaks from the reference epigenome in HepG2, K562 and HMEC (PMID: 25693563). Rep, replicate; Dup, duplicate; na, not available due to small peak number (<100).
