# Supplementary material for: Identification of factors associated with duplicate rate in ChIP-seq data
Source: PubMed Central journal article supplement (PMC6447195; doi:10.1371/journal.pone.0214723), 2019-04-03
Supplement: pone.0214723.s017.pdf [file pone.0214723.s017.pdf]

**S5 Table. Number of H3K4me3 peaks called with and without duplicate removal**

| Accession  | Sample  | Rep | Dup rate (%) | Dup in peak (%) | With Duplicate removal |                    | No duplicate removal |                    | Caller    |
|------------|---------|-----|--------------|-----------------|------------------------|--------------------|----------------------|--------------------|-----------|
|            |         |     |              |                 | Shared                 | Unique             | Shared               | Unique             |           |
| GSM1233880 | GM10847 | 1   | 20.19        | 95.67           | 32286                  | 3379 (26.63;54.87) | 33595                | 100 (32.26;34)     | macs2     |
| GSM1233881 | GM10847 | 2   | 26.19        | 96.73           | 35411                  | 3857 (23.56;51.36) | 36892                | 124 (22.94;41.94)  | macs2     |
| GSM1233905 | GM12878 | 1   | 53.96        | 82.11           | 33262                  | 837 (20.2;63.32)   | 32814                | 4762 (23.22;53.84) | macs2     |
| GSM1233906 | GM12878 | 2   | 32.75        | 93.67           | 29710                  | 2805 (22.55;65.31) | 30943                | 420 (16.67;49.52)  | macs2     |
| GSM1233907 | GM12878 | 3   | 37.78        | 91.23           | 33511                  | 2225 (21.56;61.39) | 34422                | 1096 (19.39;51.55) | macs2     |
| GSM1233926 | GM12890 | 1   | 21.08        | 94.02           | 29498                  | 2754 (21.07;60.02) | 30549                | 138 (27.45;48.55)  | macs2     |
| GSM1233927 | GM12890 | 2   | 29.32        | 97.9            | 25014                  | 4960 (20.75;64.31) | 26930                | 12 (22.45;25)      | macs2     |
| GSM1233947 | GM12891 | 1   | 55.38        | 83.71           | 33598                  | 386 (19.2;56.74)   | 32775                | 5793 (19.96;48.44) | macs2     |
| GSM1233948 | GM12891 | 2   | 30.7         | 94.2            | 28687                  | 2383 (22.44;61.39) | 29634                | 277 (21.72;48.01)  | macs2     |
| GSM1233949 | GM12891 | 3   | 34.94        | 89.5            | 36415                  | 1385 (21.65;49.82) | 36804                | 2123 (23.91;43.1)  | macs2     |
| GSM1233969 | GM12892 | 1   | 53.3         | 86.73           | 32086                  | 658 (24.85;56.08)  | 31828                | 3900 (19.86;48.62) | macs2     |
| GSM1233970 | GM12892 | 2   | 29.32        | 93.62           | 29270                  | 2209 (24.96;58.22) | 30168                | 437 (37.5;42.33)   | macs2     |
| GSM1233971 | GM12892 | 3   | 40.8         | 88.49           | 37466                  | 1274 (20.77;50.16) | 37693                | 2856 (19.92;41.98) | macs2     |
| GSM1233880 | GM10847 | 1   | 20.19        | 95.7            | 27019                  | 1559 (14.18;46.57) | 27212                | 94 (14.89;39.36)   | findPeaks |
| GSM1233881 | GM10847 | 2   | 26.19        | 96.74           | 27592                  | 1525 (15.54;45.64) | 27808                | 131 (18.32;34.35)  | findPeaks |
| GSM1233905 | GM12878 | 1   | 53.96        | 83.95           | 27472                  | 1784 (11.88;66.7)  | 26797                | 5532 (14.46;29.39) | findPeaks |
| GSM1233906 | GM12878 | 2   | 32.75        | 94.5            | 27199                  | 2094 (12.51;61.22) | 27321                | 933 (12;43.94)     | findPeaks |
| GSM1233907 | GM12878 | 3   | 37.78        | 92.48           | 28752                  | 1959 (12.05;59.78) | 28793                | 1447 (11.68;34.28) | findPeaks |
| GSM1233926 | GM12890 | 1   | 21.08        | 94.52           | 25757                  | 1878 (13.31;50.16) | 25930                | 409 (9.05;51.34)   | findPeaks |
| GSM1233927 | GM12890 | 2   | 29.32        | 98.11           | 23066                  | 2752 (13.59;58.47) | 23323                | 214 (11.68;66.36)  | findPeaks |
| GSM1233947 | GM12891 | 1   | 55.38        | 85.23           | 29464                  | 1663 (10.22;57.97) | 28926                | 5990 (12.8;25.16)  | findPeaks |
| GSM1233948 | GM12891 | 2   | 30.7         | 94.74           | 27005                  | 1620 (14.88;55.37) | 27103                | 669 (11.51;44.1)   | findPeaks |
| GSM1233949 | GM12891 | 3   | 34.94        | 90.89           | 31739                  | 1215 (11.19;45.76) | 31633                | 2154 (13.32;27.11) | findPeaks |
| GSM1233969 | GM12892 | 1   | 53.3         | 87.89           | 27630                  | 1341 (11.33;63.68) | 27306                | 3953 (13.89;32.1)  | findPeaks |
| GSM1233970 | GM12892 | 2   | 29.32        | 94.23           | 26696                  | 1494 (14.46;50.33) | 26800                | 628 (12.9;42.36)   | findPeaks |
| GSM1233971 | GM12892 | 3   | 40.8         | 89.7            | 31736                  | 1032 (10.66;52.03) | 31470                | 3335 (12.77;26.36) | findPeaks |

Number in the parenthesis refers to the percentage of unique peaks overlapping the 4-kb windows centered on the transcriptional start sites and H3K4me3 peaks from the GM12878 reference epigenome (PMID: 25693563). Rep, replicate; Dup, duplicate.
